# Supplementary material for: Rice APC/CTE controls tillering by mediating the degradation of MONOCULM 1
Source: PubMed Central journal article supplement — Nat Commun. 2012 Mar 20;3:752–. doi: 10.1038/ncomms1716 (PMC3316886; doi:10.1038/ncomms1716), 2012-03-20
Supplement: ncomms1716-s1.pdf [file ncomms1716-s1.pdf]

## Supplementary Information

### Rice APC/C<sup>TE</sup> controls tillering through mediating the degradation of MONOCULM 1

Qibing Lin<sup>1\*</sup>, Dan Wang<sup>1\*</sup>, Hui Dong<sup>2\*</sup>, Suhai Gu<sup>1</sup>, Zhijun Cheng<sup>1</sup>, Jie Gong<sup>2</sup>, Ruizhen Qin<sup>1</sup>, Ling Jiang<sup>2</sup>, Gang Li<sup>3</sup>, Jiu Lin Wang<sup>1</sup>, Fuqing Wu<sup>1</sup>, Xiuping Guo<sup>1</sup>, Xin Zhang<sup>1</sup>, Cailin Lei<sup>1</sup>, Haiyang Wang<sup>1</sup>, Jianmin Wan<sup>1,2</sup>

<sup>1</sup>National Key Facility for Crop Gene Resources and Genetic Improvement, Institute of Crop Science, Chinese Academy of Agricultural Sciences, Beijing 100081, China

<sup>2</sup>National key Laboratory for Crop Genetics and Germplasm Enhancement, Jiangsu Plant Gene Engineering Research Center, Nanjing Agricultural University, Nanjing 210095, China

<sup>3</sup>Department of Molecular, Cellular, and Developmental Biology, Yale University, New Haven, Connecticut 06520-8104

# Supplementary Figures

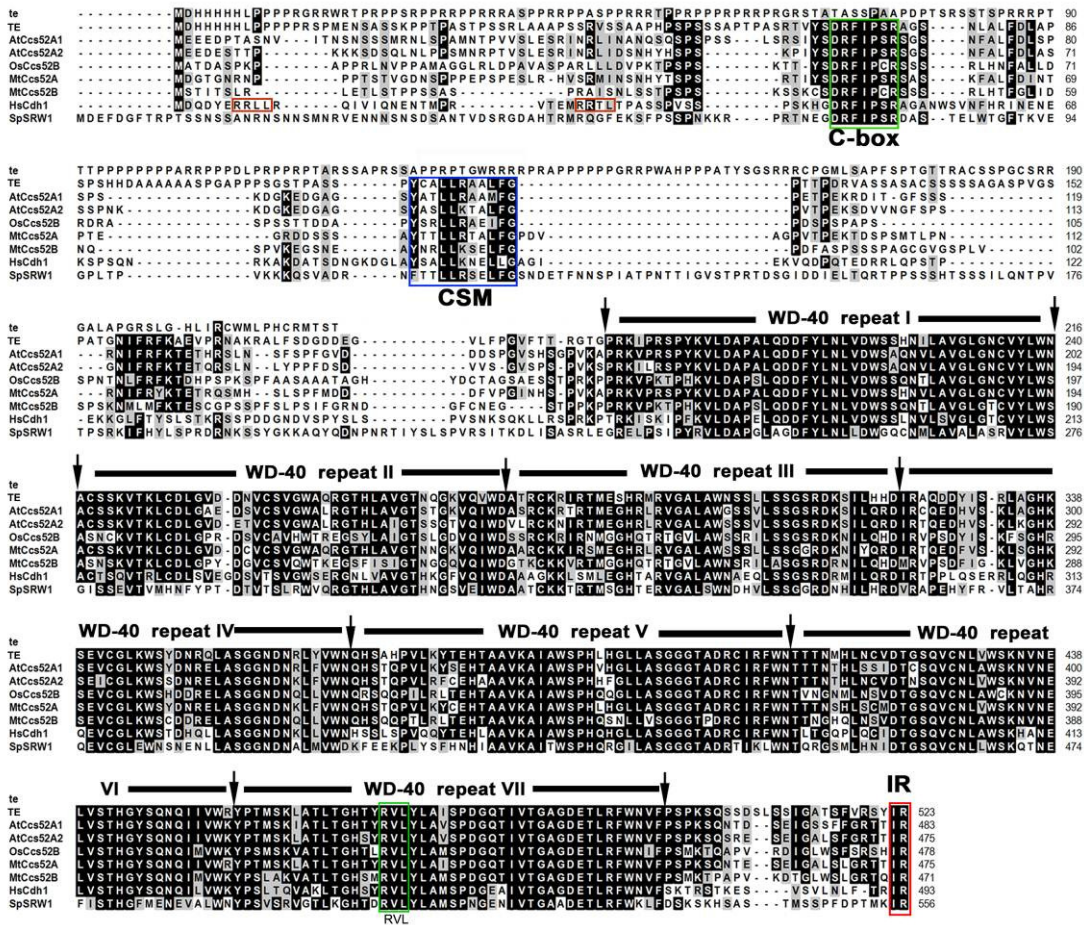

**Supplementary Figure S1 | Protein sequence alignment of Cdh1-like proteins of *S. pombe* (SpSRW1), *H. sapiens* (HsCdh1), *A. thaliana* (AtCcs52A1, AtCcs52A2), *M. truncatula* (MtCcs52A, MtCcs52B), *O. sativa* (TE, OsCcs52B) and the truncated te protein. The conserved domains (seven WD-40 repeats) and motifs (C-box, CSM, IR, and RVL) are marked. In addition, the two degradation signals are also marked by two red boxes in the N-terminal region of HsCdh1.**

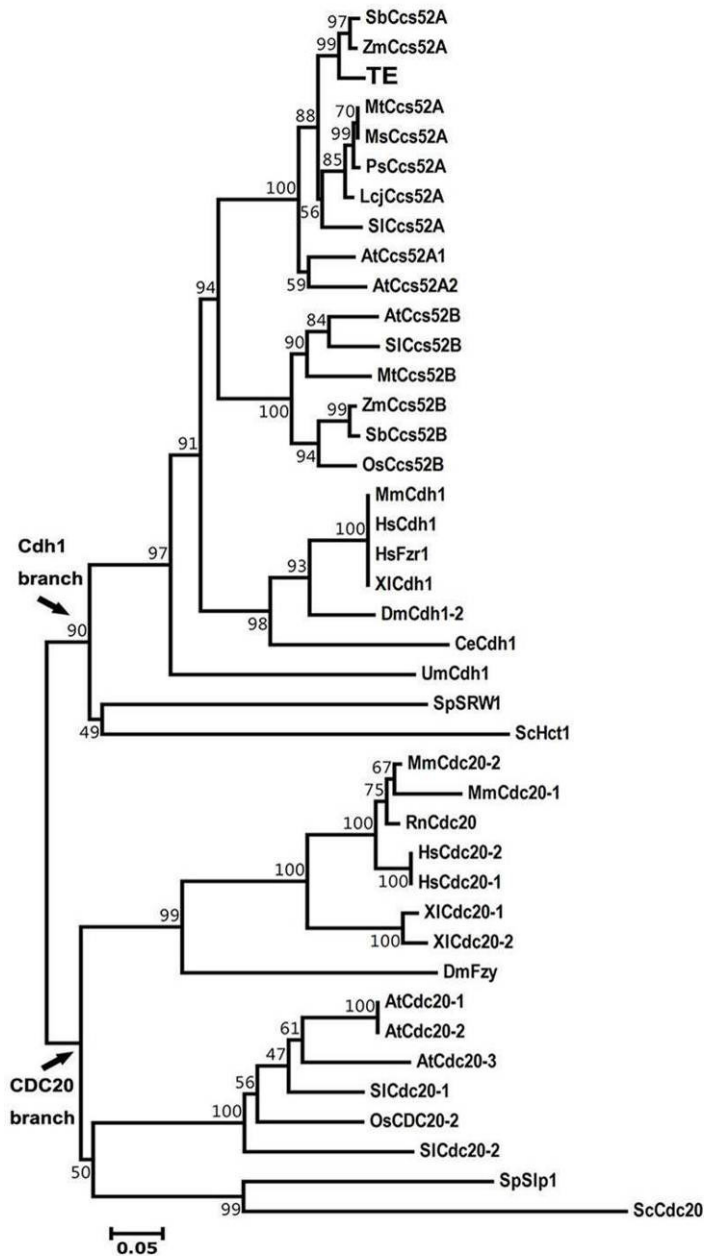

**Supplementary Figure S2 | Phylogenetic analysis of TE protein.** Protein sequences were aligned with CLUSTAL W in MEGA4.0<sup>49</sup> and the phylogenetic tree was analyzed by MEGA4.0<sup>49</sup>. Accession numbers presented here are the following: SpSlp1, P78972; ScCdc20, P26309; SICdc20-1, CBH19893; OsCDC20-2, BAF15668.1; SICdc20-2, CBH19894; MmCdc20-1, XP 139652; HsCdc20-1, NP 001246; HsCdc20-2, A56021; MmCdc20-2, NP 075712; RnCdc20, NP 741990; XlCdc20-1, AAH42288; XlCdc20-2, AAC41376; DmFzy, NP 477501; AtCdc20-1, At4g33260; AtCdc20-2, At4g33270; AtCdc20-3, At5g27570; ScHct1, P53197; UmCdh1, AY118173; SpSRW1, O13286.1;

CeCdh1, NP 496075; XlCdh1, CAA74576; HsCdh1, NP 057347; HsFzr1, Q9UM11.2; MmCdh1, NP 062731; DmCdh1-2, NP 726941; OsCcs52B, LOC\_Os01g74146; AtCcs52A2, At4g11920; AtCcs52A1, At4g22910; SlCcs52A, CBH19891; MtCcs52A, AF134835; TE, LOC\_Os03g03150; ZmCcs52A, ACN36196; ZmCcs52B, ACG33710; AtCcs52B, At5g13840; MtCcs52B, AY357299; SpSrw1, O13286; SlCcs52B, CBH19892; LcjCcs52A, DQ059035.1; PsCcs52A, DQ059036; MsCcs52A, AF079404; SbCcs52A, XP\_002468612.1; and SbCcs52B, XP\_002457025.1. *Sp*, *S. pombe*; *Sc*, *S. cerevisiae*; *Sl*, *Solanum lycopersicum*; *Mm*, *Mus musculus*; *Hs*, *Homo sapiens*; *Rn*, *Rattus norvegicus*; *Xl*, *Xenopus laevis*; *Dm*, *D. melanogaster*; *At*, *A. thaliana*; *Um*, *Ustilago maydis*; *Ce*, *Caenorhabditis elegans*; *Os*, *Oryza sativa*; *Mt*, *M. truncatula*; *Zm*, *Zea mays*; *Lcj*, *Lotus corniculatus var. Japonicus*; *Ps*, *Pisum sativum*; *Ms*, *Medicago sativa*; *Sb*, *Sorghum bicolor*.

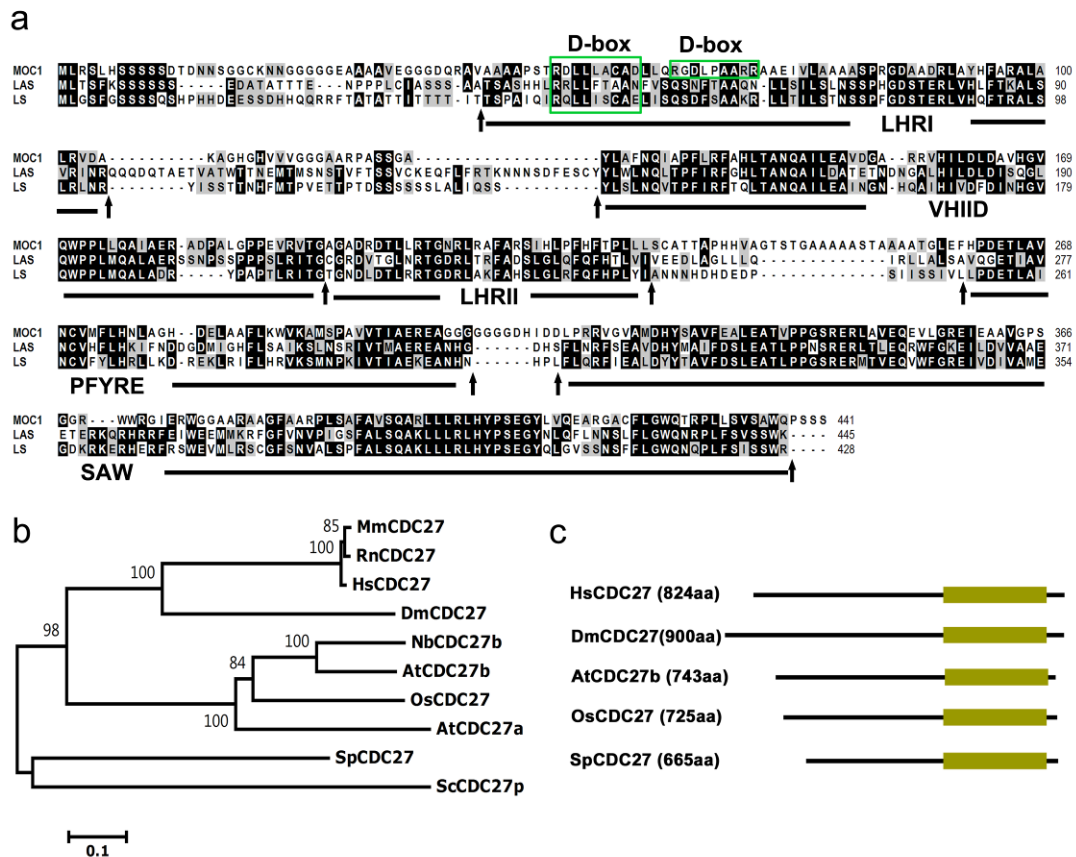

### Supplementary Figure S3 | Phylogenetic and protein sequence analysis of MOC1

and OsCDC27. (a) Sequence alignment of MOC1, LAS and LS proteins. The conserved domains (LHRI, VHIID, LHR II, PFYRE and SAW) were marked. The typical degradation box (D-box) is marked by a green box in the N-terminal region of MOC1, LAS and LS. (b) Phylogenetic analysis showing that OsCDC27 is the rice homolog of HsCDC27, DmCDC27, AtCDC27a, AtCDC27b, and SpCDC27. Protein sequences were aligned with CLUSTAL W in MEGA4.0<sup>49</sup> and the phylogenetic tree was constructed by MEGA4.0<sup>49</sup>. Accession numbers presented here are the following: HsCDC27, NP\_001247.3; MmCDC27, NP\_663411.2; RnCDC27, NP\_001019964.1; DmCDC27, NP\_648093.2; SpCDC27, NP\_594604.2; ScCDC27p, NP\_009469.1; AtCDC27b, NP\_849994.1; AtCDC27a, NP\_188253.3; OsCDC27, NP\_001058099.1; NbCDC27b, BAF64845.1. (c) OsCDC27 has the same conserved TPR domain (indicated as green boxes) as HsCDC27, DmCDC27, AtCDC27b, and SpCDC27 in their C-terminal region.

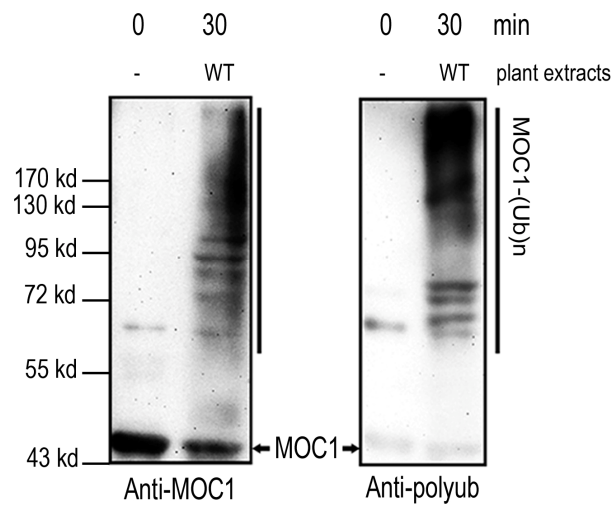

**Supplementary Figure S4 | Ubiquitination analysis of MOC1.** *In vitro* ubiquitination assay showing that MOC1 is poly-ubiquitinated (represented by multiple up-shifted bands) by WT plant extracts and can be detected by antibodies against MOC1 or polyub antibodies on Western blots.

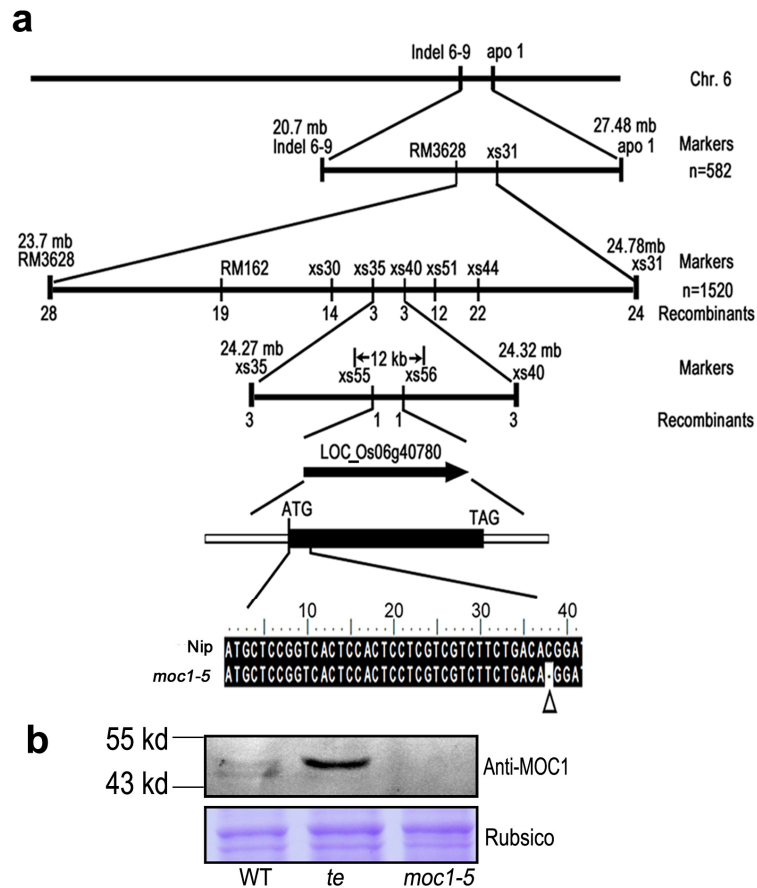

**Supplementary Figure S5 | Mapping of the *moc1-5* allele. (a)** Mapping of *moc1-5*. **(b)** Western blot analysis showing the absence of MOC1 proteins in *moc1-5* plants (top). Rubisco staining showing a roughly equal loading of proteins (bottom).

## Supplementary Tables

**Supplementary Table S1 | Molecular markers used for mapping of the *TE* gene**

| Marker       | Type         | Primer sequences (5' → 3')     |                               |
|--------------|--------------|--------------------------------|-------------------------------|
|              |              | Forward primer                 | Reverse primer                |
| <b>g41</b>   | <b>SSR</b>   | <b>CGCTCTGAAATCCGATATTTGC</b>  | <b>GGCTCTCTCCTCCTCGTTGC</b>   |
| <b>RM22</b>  | <b>SSR</b>   | <b>GGTTTGGGAGCCCATAATCT</b>    | <b>CTGGGCTTCTTTCACCTCGTC</b>  |
| <b>RM523</b> | <b>SSR</b>   | <b>AAGGCATTGCAGCTAGAAGC</b>    | <b>AAGGCATTGCAGCTAGAAGC</b>   |
| <b>g62</b>   | <b>InDel</b> | <b>GCATAACATCAAAGCCATGCTA</b>  | <b>GCTCCAATTCGATCTTCGTC</b>   |
| <b>g105</b>  | <b>InDel</b> | <b>GCCCTTCTCATTGCCTCG</b>      | <b>CTCTTCTCGCTTCTTCTTTTCG</b> |
| <b>g118</b>  | <b>InDel</b> | <b>ATGTACAATAGTATTCCCACGTC</b> | <b>AAAACAAGGTTTAATGGTAGTG</b> |



**Supplementary Table S2 | Molecular markers developed in this study for mapping of the *mol-5* allele**

| Marker    | Type  | Primer sequences (5' → 3')  |                          |
|-----------|-------|-----------------------------|--------------------------|
|           |       | Forward primer              | Reverse primer           |
| Indel 6-9 | InDel | GTGCGAATTCCTCCACCTC         | CGACATGGCTGGTCTCTCTC     |
| xs31      | InDel | TGCCAATTAGCTCGATTCTG        | TGGTCAAAATTTGTTCAAACCTCA |
| apo1      | InDel | CCGGTTTTGGTTTGTCTCAG        | ATTCCTTTGTGGGCTCCTTT     |
| RM3628    | SSR   | GCCCTAGACACACCCGTACC        | TGCCAGATCAGAAATCATGC     |
| RM162     | SSR   | GTGGTAGGGCGAAATGATCTGC      | ATCACGCGCTCCTACCTCACC    |
| xs30      | InDel | CAGCCGATTGGACTCGAT          | AACACCTTGCCGAACACC       |
| xs35      | InDel | TAAAAGAAAGGTTACTCATGGATTTTT | TAATGCCTGCTGCATCTTAGG    |
| xs40      | InDel | TCCTCACACACAAGCACACA        | TCAAATTGGCATGCATTGAT     |
| xs51      | InDel | AAGTTCGCCGGAGAGAGAAG        | CAGCGTCATGGTTTCTGAAAGCCA |
| xs44      | InDel | TTAATTAATCACCAATGCAATCTATGA | CCAGCAACTTTTGCTTTGTG     |
| xs55      | InDel | CTTAGATTTGACACAACCTGCAC     | ATTCTGCAGTGCACGAGCTA     |
| xs56      | InDel | AACTATAGATCGGGATCGCTCA      | TTCAAAGAAACGAAAATCAACG   |

**Supplementary Table S3 Primers used for construction of protein expression plasmids**

| <b>Fragment or plasmid</b>  | <b>Forward primer (5' → 3')</b>               | <b>Reverse primer(5' → 3')</b>                     |
|-----------------------------|-----------------------------------------------|----------------------------------------------------|
| <b>TE</b>                   | <b>CTAGGAAGATCTATGGATC<br/>ACCACCACCACCAC</b> | <b>CTAGATCTCGAGTCACCGGATGT<br/>AGCTCCTAACAAATG</b> |
| <b>MOC1</b>                 | <b>CGCGGATCCATGCTCCGG<br/>TCACTCCACTCC</b>    | <b>CGCAAGCTTCTACGACGACGACG<br/>GCTGCCA</b>         |
| <b>pMAL-c2x::MBP-MOC1-m</b> | <b>GCGGACTTGGCGCTGGCG<br/>TGCGCGGACCTG</b>    | <b>CGTCGACGGCGCCGCCGCCGCA<br/>ACGGCAC</b>          |

**Supplementary Table S4 Primers used for construction of yeast two-hybrid assay plasmids**

| <b>Fragment</b> | <b>Forward primer (5'→3')</b>                     | <b>Reverse primer (5'→3')</b>                        |
|-----------------|---------------------------------------------------|------------------------------------------------------|
| <b>OsCDC27</b>  | <b>AGTGAATTCATGGAAACCCTAATGGTGGAC</b>             | <b>ATAGGATCCTTAAATCTCATCATCATCAT<br/>CATCATCATCC</b> |
| <b>MOC1</b>     | <b>AGTGAATTCATGCTCCGGTCACTCCACTCCTC</b>           | <b>AATGGATCCCTACGACGACGACGGCTGC</b>                  |
| <b>MOC1-m</b>   | <b>AGTGAATTCATGCTCCGGTCACTCCACTCCTC</b>           | <b>AATGGATCCCTACGACGACGACGGCTGC</b>                  |
| <b>MOC1d</b>    | <b>AGTGAATTCGGCCATGGCCACGTCGTC</b>                | <b>AATGGATCCCTACGACGACGACGGCTGC</b>                  |
| <b>TE</b>       | <b>GGAATTCCATATGATGGATCACCACCACCACCA<br/>CCTG</b> | <b>CTAGGAAGATCTTCACCGGATGTAGCTC<br/>CTAACAAATG</b>   |

**Supplementary Table S5 Primers used in Real time Quantitative RT-PCR**

| Gene Name | Type    | Primer sequences (5' → 3') |                         |
|-----------|---------|----------------------------|-------------------------|
|           |         | Forward primer             | Reverse primer          |
| Actin     | qRT-PCR | TCGTCTGCGATAATGGAACTG      | CCGACAATGCTGGGGAAG      |
| TE        | qRT-PCR | TGGTCTTCGCATAATATCCTTG     | TGTCCCTACAGCAAGGTGAGT   |
| OsTB1     | qRT-PCR | CCTACCATGAGAGAAGAGACCA     | GTAGTGGGCTATGATCAGATGTG |
| OSH1      | qRT-PCR | CTCAACACGCTCTCCATCTC       | GCTTGAGCTCCTGATCCAC     |

**Supplementary Reference:**

49. Tamura, K., Dudley, J., Nei, M. & Kumar, S. MEGA4: Molecular Evolutionary Genetics Analysis (MEGA) software version 4.0. *Mol. Biol. Evol.* **24**, 1596-1599 (2007).
